# Supplementary material
Source: PubMed Central journal article supplement (PMC10798305)
Supplement: media-1.pdf [file media-1.pdf]

**A**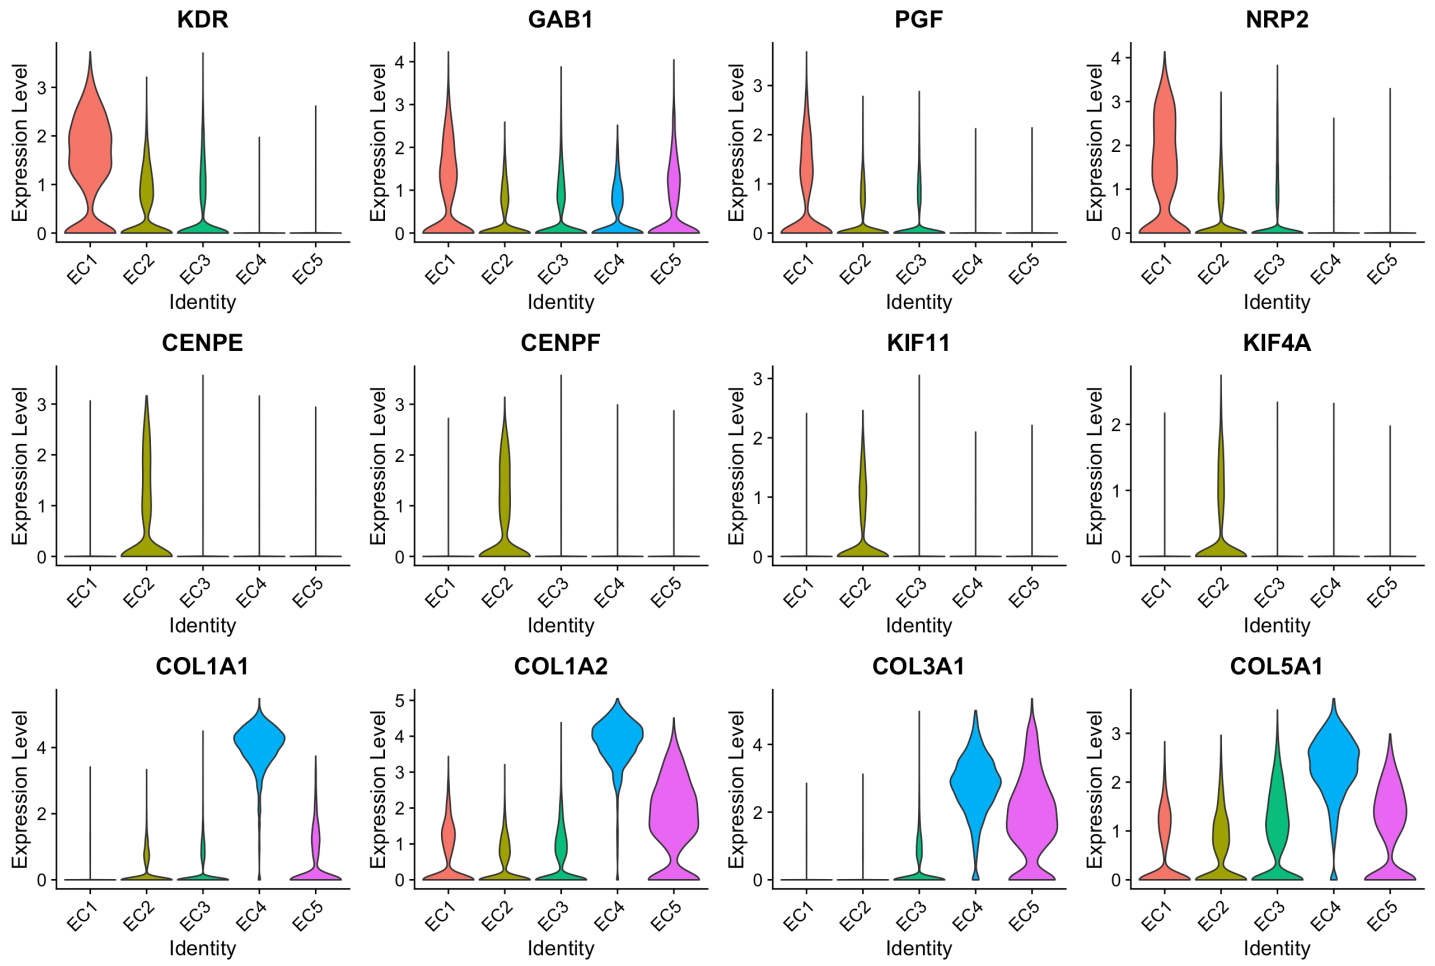

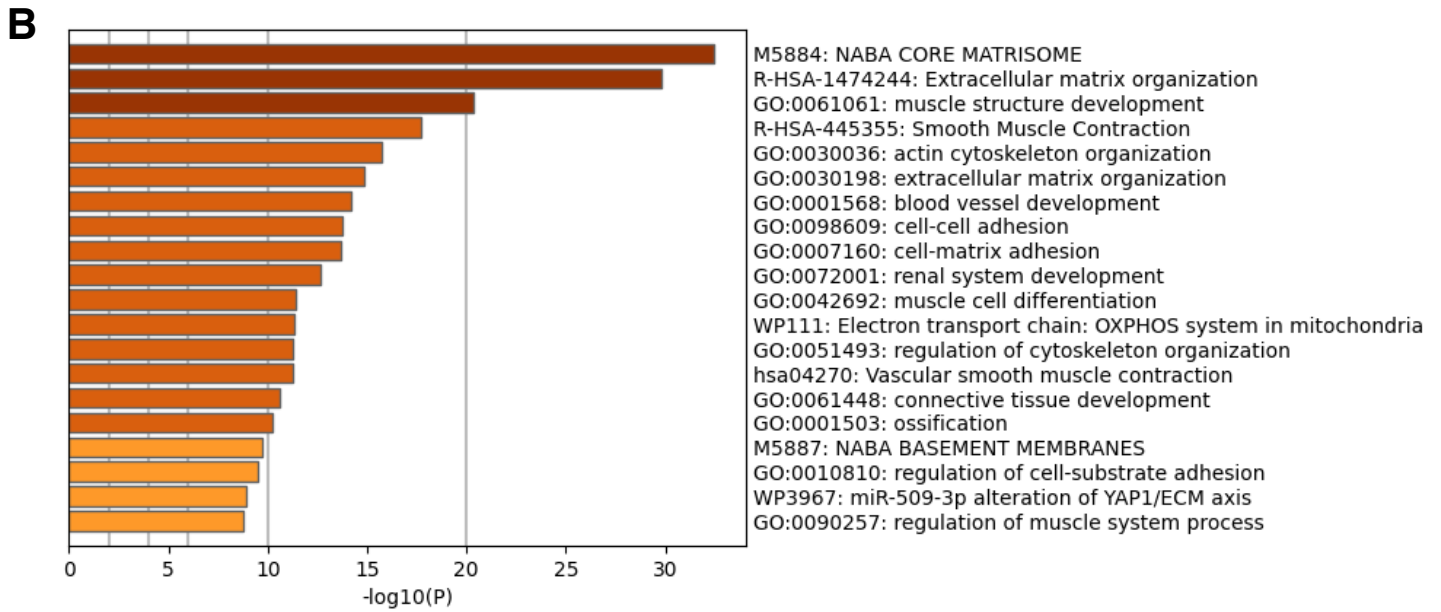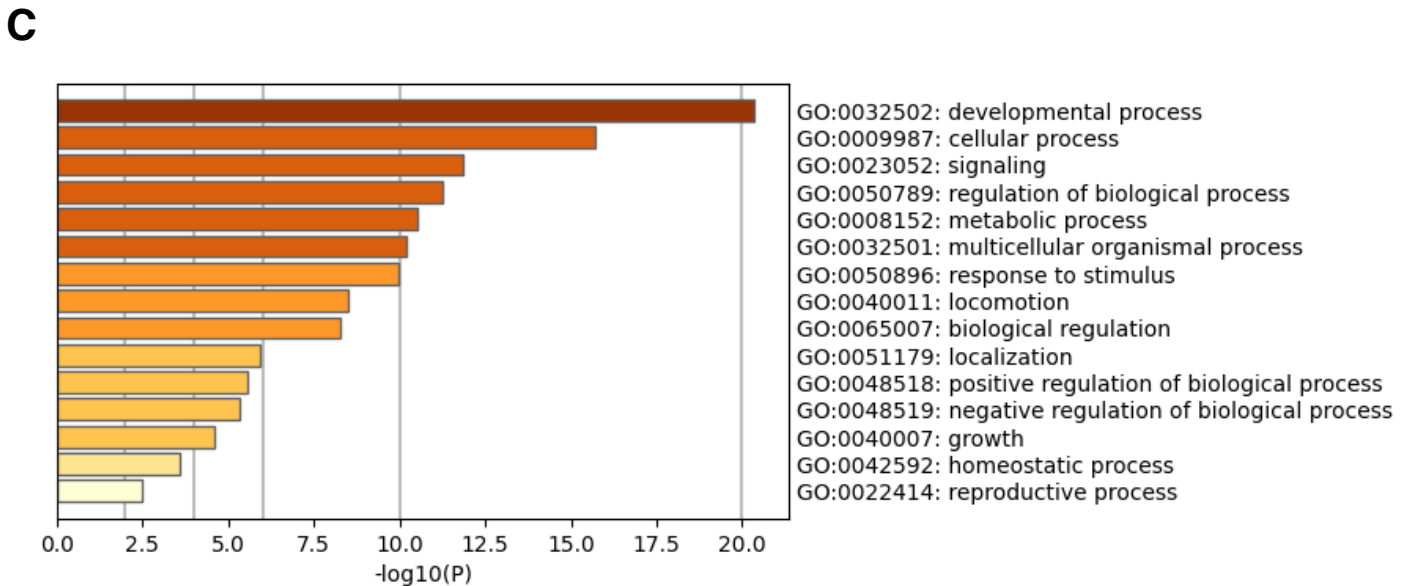

**Supplementary Figure 1 (Figure S1) – Related to Figure 1 | (A)**, Violin plots of representative marker genes for angiogenic EC1 (*KDR*, *GAB1*, *PGF*, *NRP1*), proliferative EC2 (*CENPE*, *CENPF*, *KIF11*, *KIF4A*), and mesenchymal EC4 (*COL1A1*, *COL1A2*, *COL3A1*, *COL5A1*) sub-phenotypes. **(B)**, Top 20 pathway enrichment analysis (PEA) results from submitting top 200 differentially expressed genes (DEGs; by ascending p-value) regulated in EC3 versus EC1-2 and EC4-5. **(C)**, Top 20 Gene Ontology (GO) PEA results from submitting top 200 DEGs (by ascending p-value) regulated in EC3 versus EC1-2 and EC4-5.

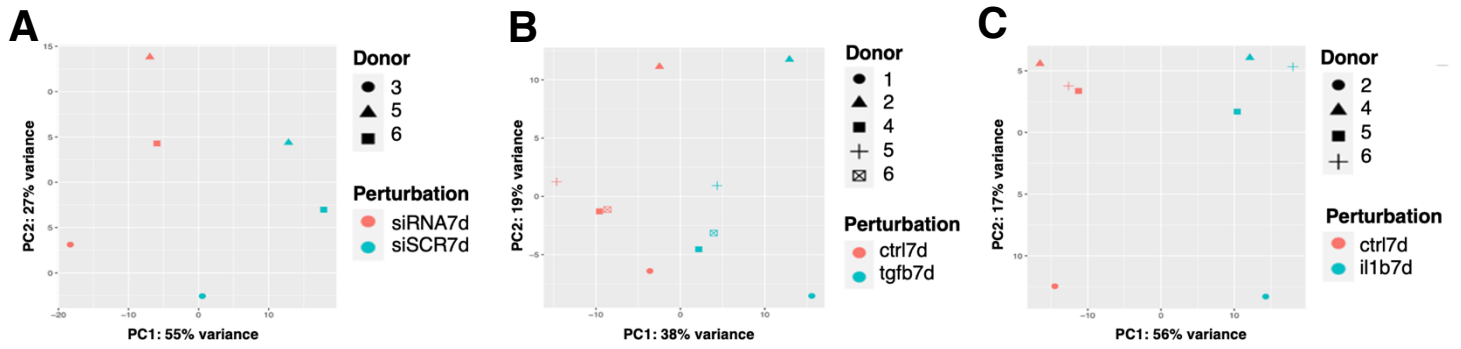

**Supplementary Figure 2 (Figure S2) – Related to Figure 3 I (A)**, Principal component analysis (PCA) of EC1-4 snRNA-seq samples +/- siERG or control across donor replicates. **(B)**, PCA of EC1-4 snRNA-seq samples +/- TGFB2 or control across donor replicates. **(C)**, PCA of EC1-4 snRNA-seq samples +/- IL1B or control across donor replicates.

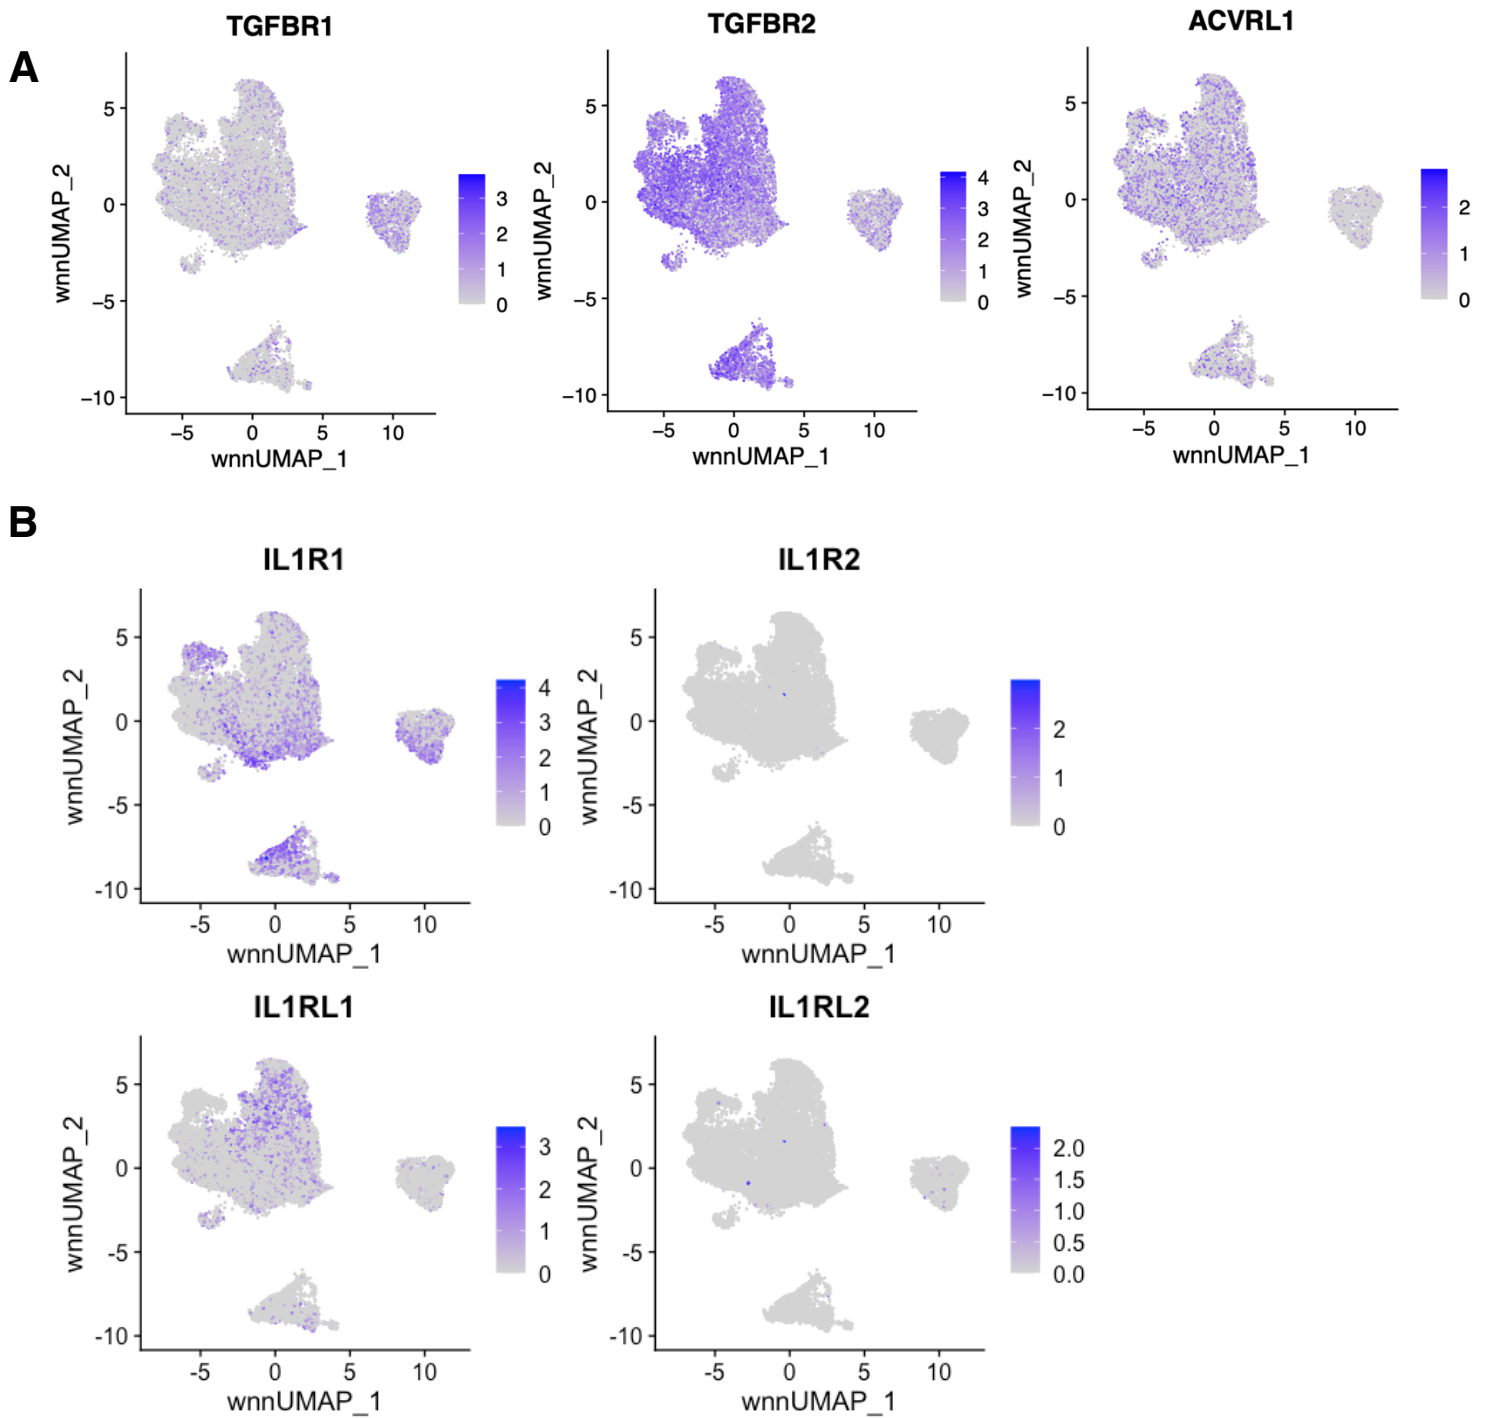

**Supplementary Figure 3 (Figure S3) – Related to Figure 3 I (A).** Feature plots of expression of TGF $\beta$  pathway receptors: *TGFBR1*, *TGFBR2*, and *ACVRL1*. **(B)**, Feature plots of IL1 $\beta$  pathway receptors: *IL1R1*, *IL1R2*, *IL1RL1*, and *IL1RL2*.



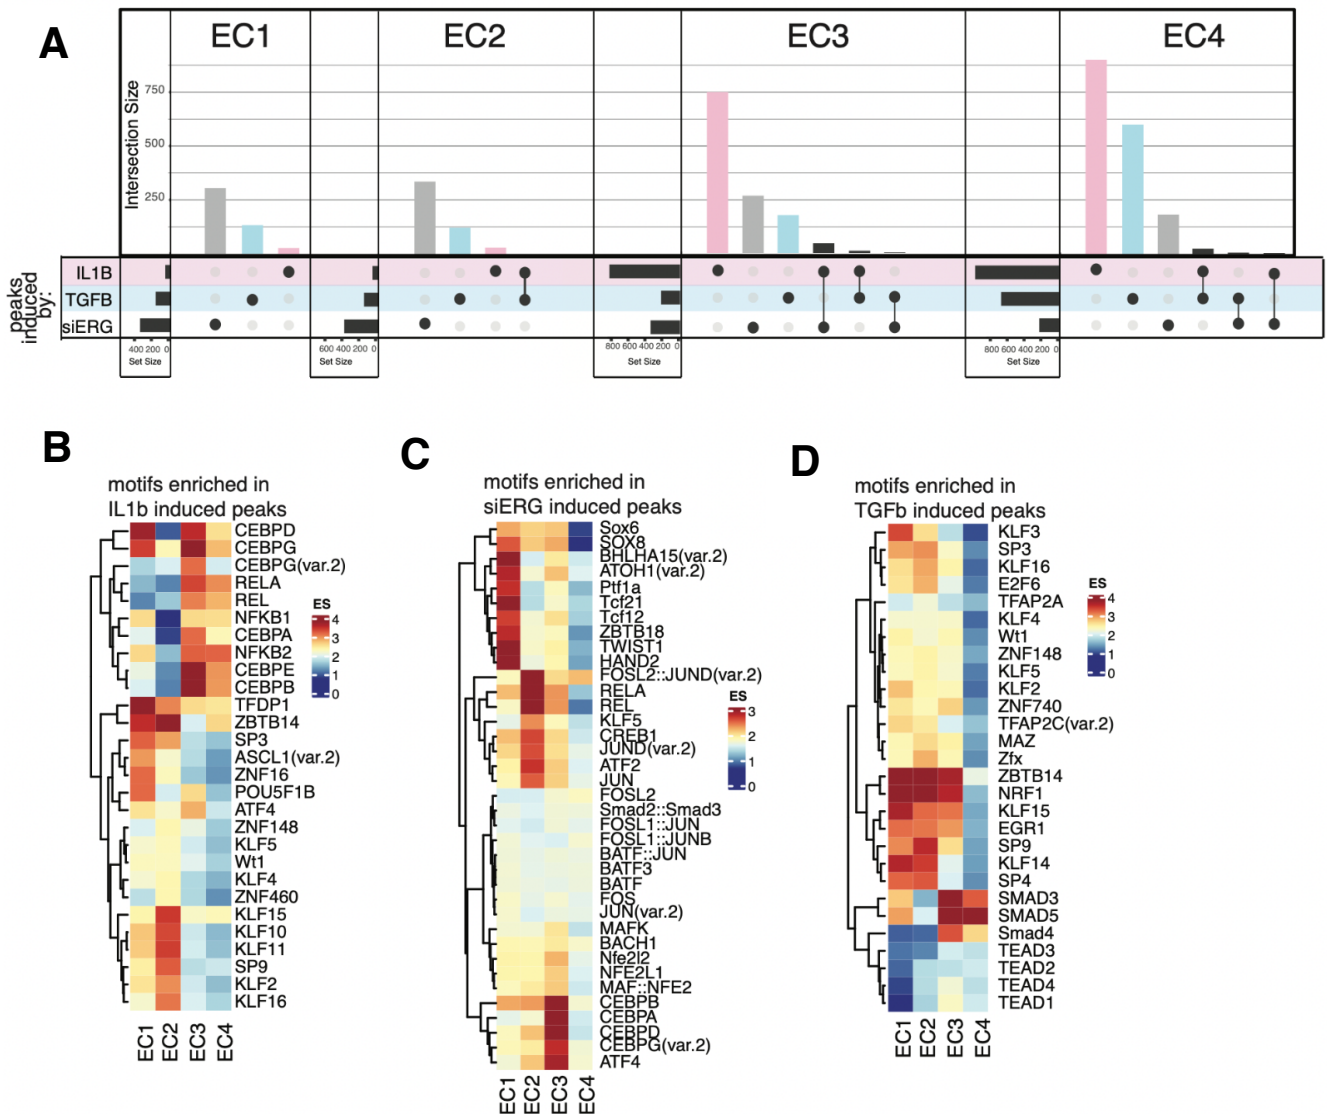

**Supplementary Figure 4 (Figure S4) I (A)**, Upset plot of induced peaks for siERG (grey), IL1B (pink), and TGFB2 (blue) across EC1, EC2, EC3, and EC4. Upset plots visualize intersections between sets in a matrix, where the columns of the matrix correspond to the sets, and the rows correspond to the intersections. Intersection size represents the number of genes at each intersection. **(B)**, Heatmap of top motifs enriched in IL1B-induced peaks. Top TFs for each EC subtype are selected based on ascending p-value. Rows (TFs) and columns (EC subtype) are clustered based on enrichment score (ES). **(C)**, Heatmap of top motifs enriched in siERG-induced peaks. **(D)**, Heatmap of top motifs enriched in TGFB2-induced peaks.

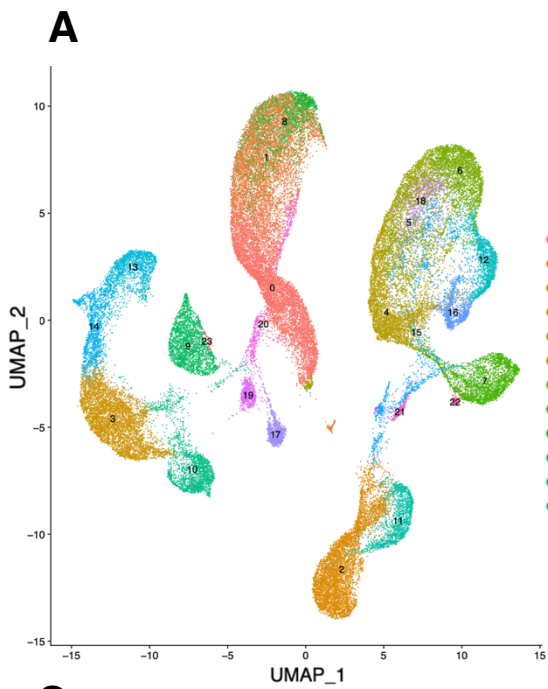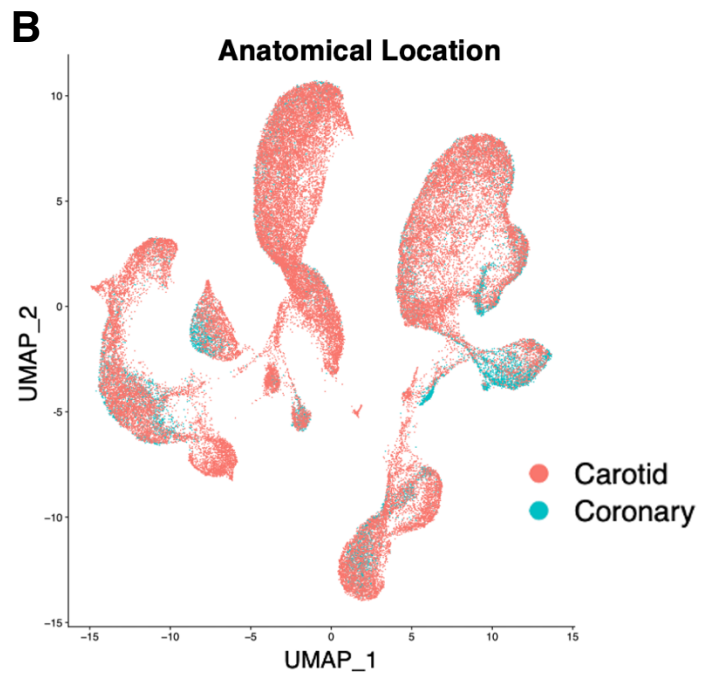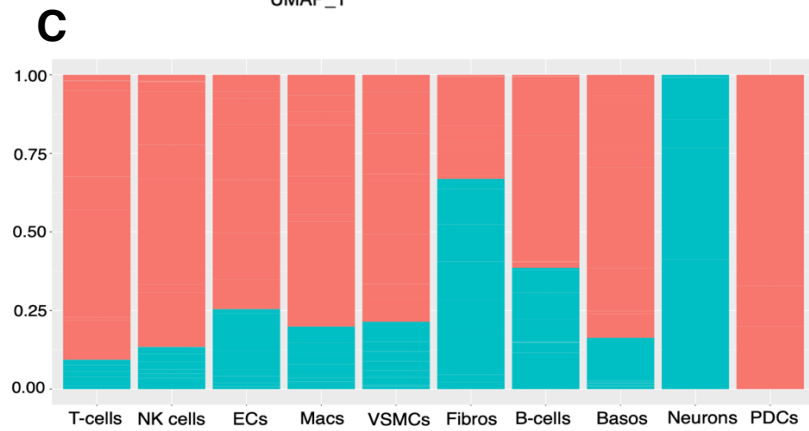

**Location**

Carotid

Coronary

T-cells = T-Lymphocytes

NK cells = Natural Killer Cells

Macs = Macrophages

Fibros = Fibroblasts

B-cells = B-Lymphocytes

Basos = Basophils

PDCs = Plasmacytoid dendritic cells

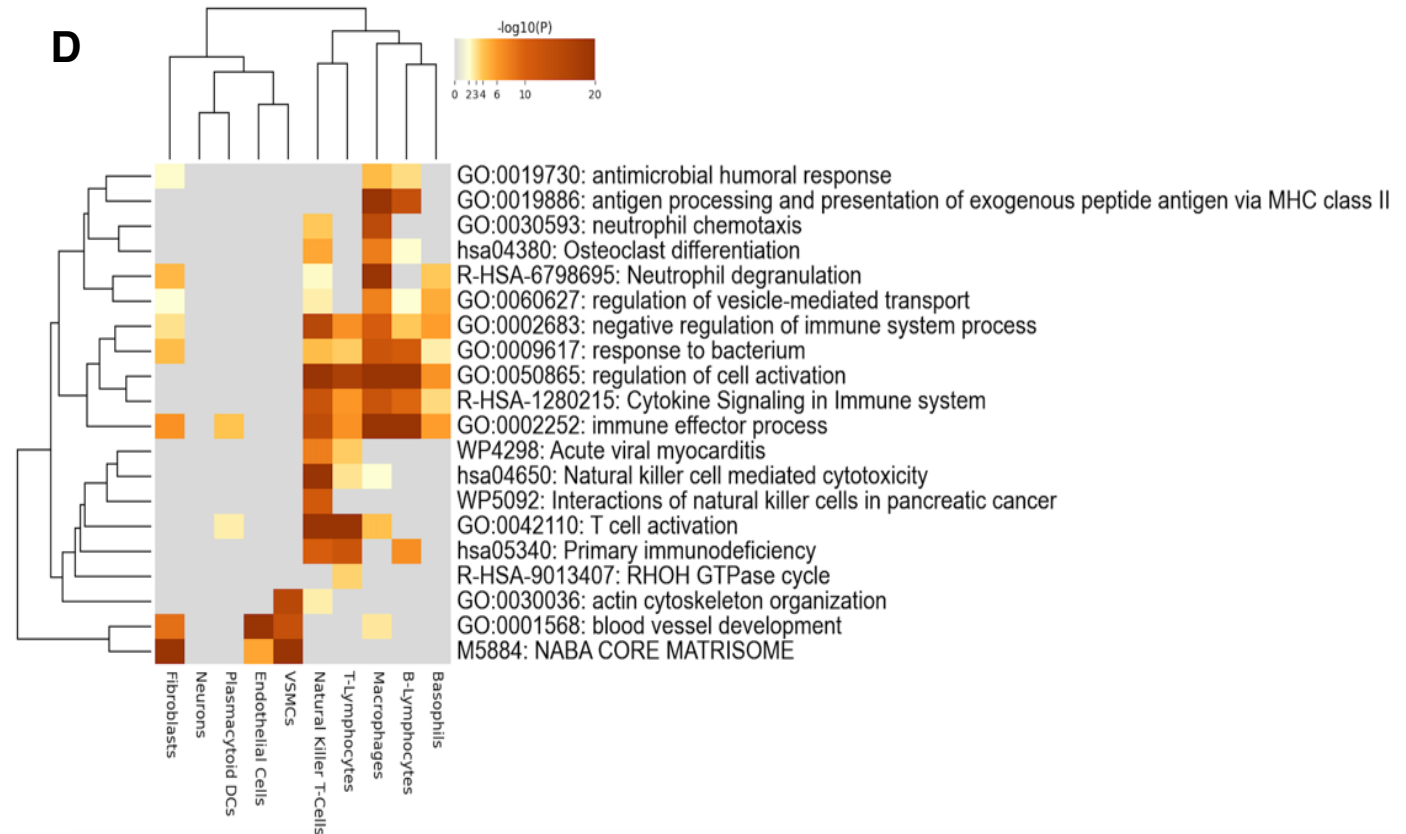

**E**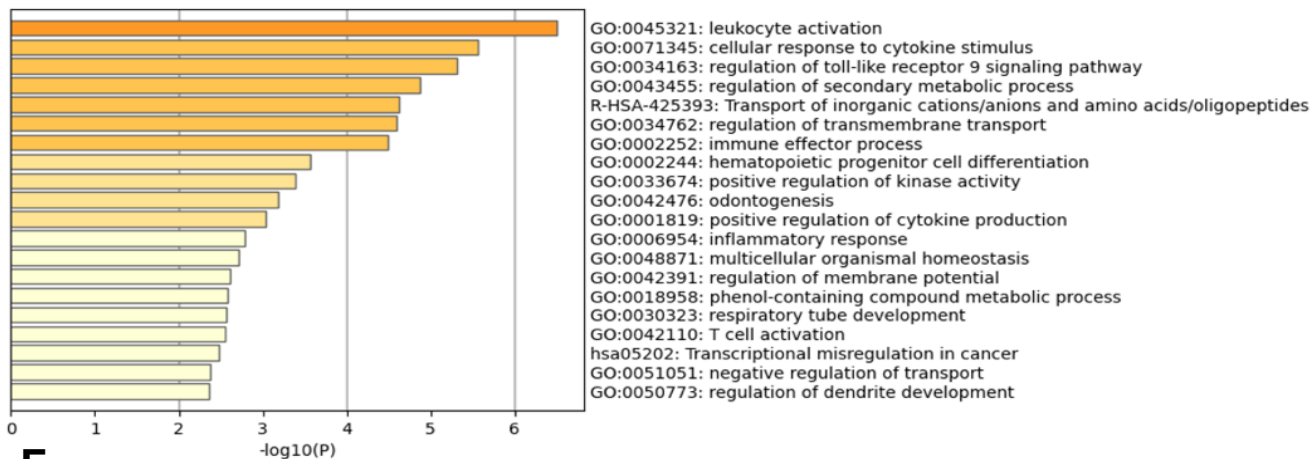**F**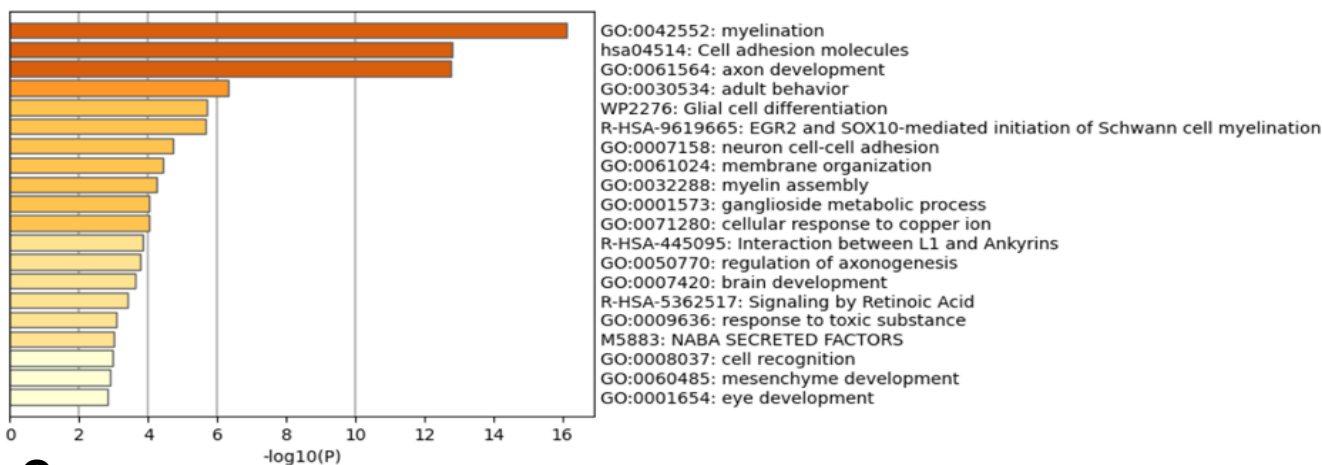**G**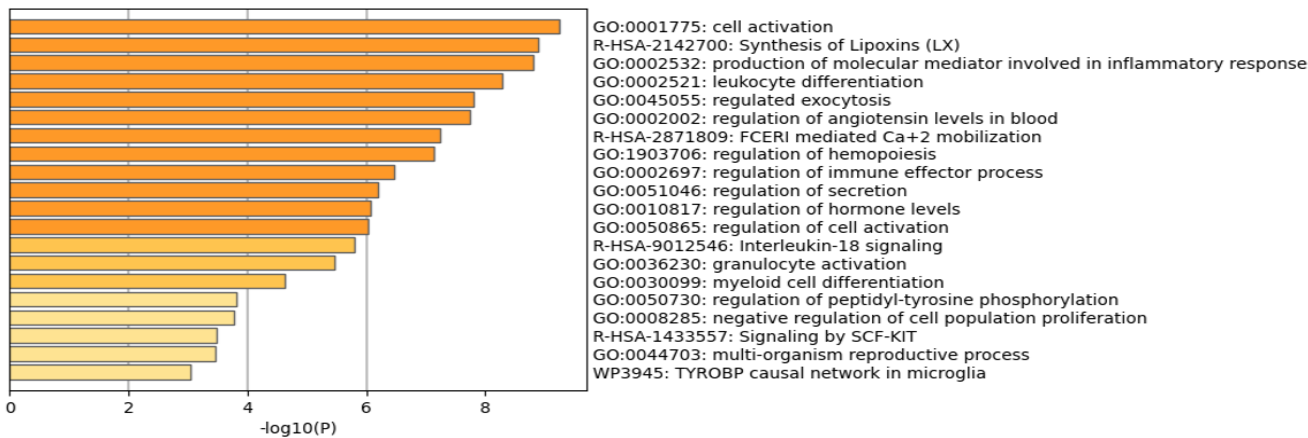

**Supplementary Figure 5 (Figure S5) – Related to Figure 5 I (A)**, UMAP displaying original clusters formed from scRNA-seq data taken from 17 samples across 4 studies of human *ex vivo* atherosclerotic plaques. Colors denote different clusters. **(B)**, UMAP from (A). Colors denote anatomical location from which cells derived. **(C)**, Stacked bar graph showing the distribution of anatomic location (red denoting carotid, blue denoting coronary arteries) from which cells derived. **(D)**, Heatmap of PEA results from submitting top 100 DEGs (by ascending p-value) between *ex vivo* cell types. Rows (pathways) and columns (cell subtypes) are clustered based on  $-\text{Log}_{10}(P)$ . **(E)**, PEA of the top 100 DEGs (by ascending p-value) for PDCs. **(F)**, PEA of the top 100 DEGs (by ascending p-value) for neurons. **(G)**, PEA of the top 100 DEGs (by ascending p-value) for basophils. Adjusted p-value < 0.05 for DEGs submitted in D-G.

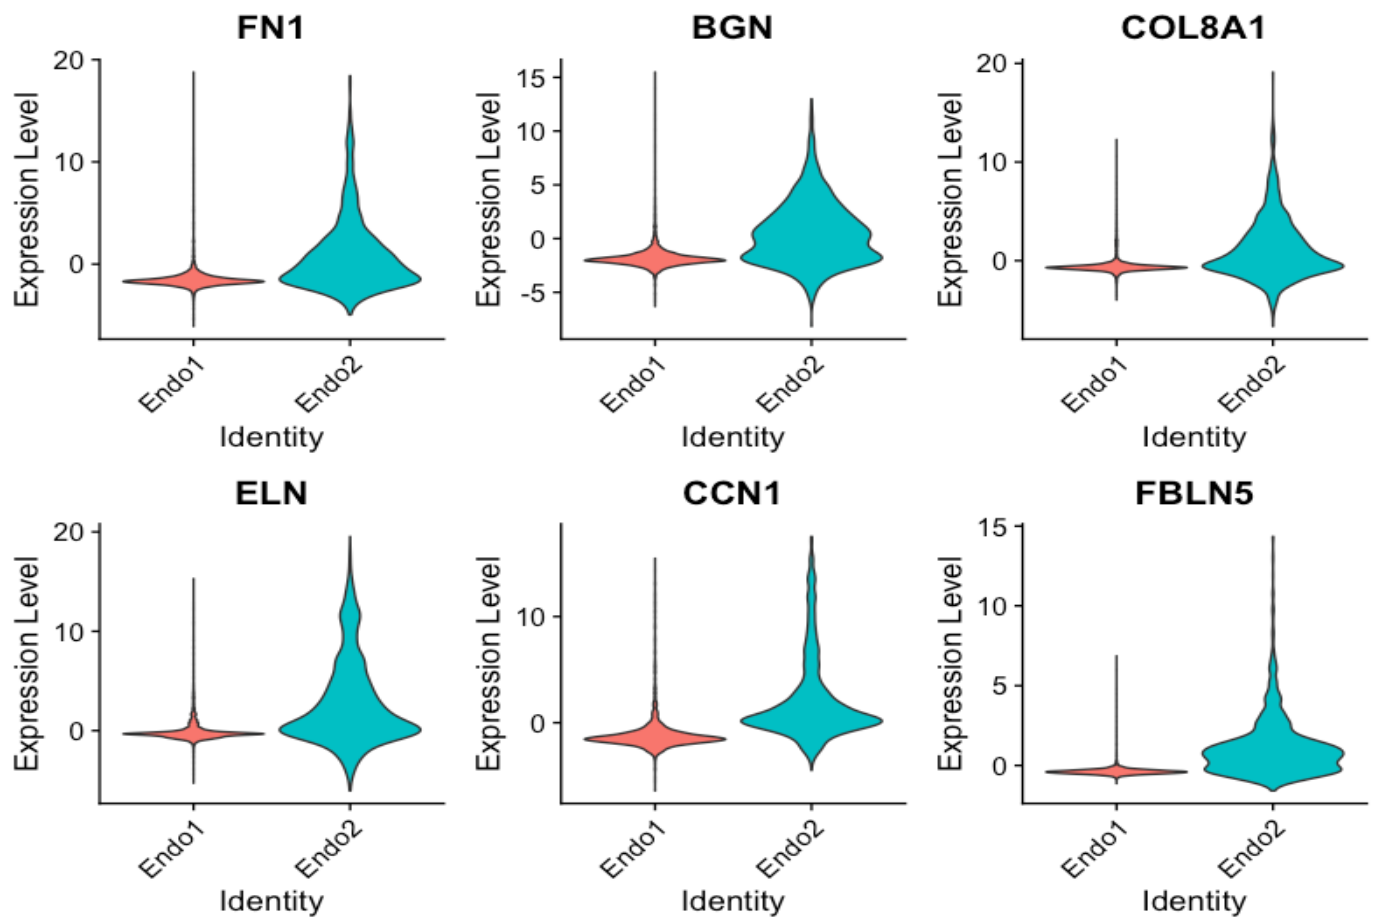

**Supplementary Figure 6 (Figure S6) – Related to Figure 5 |** Violin plots displaying upregulation of several EndMT markers in Endo2, compared to Endo1, including: *FN1*, *BGN*, *COL8A1*, *ELN*, *CCN1*, *FBLN5*.

**A**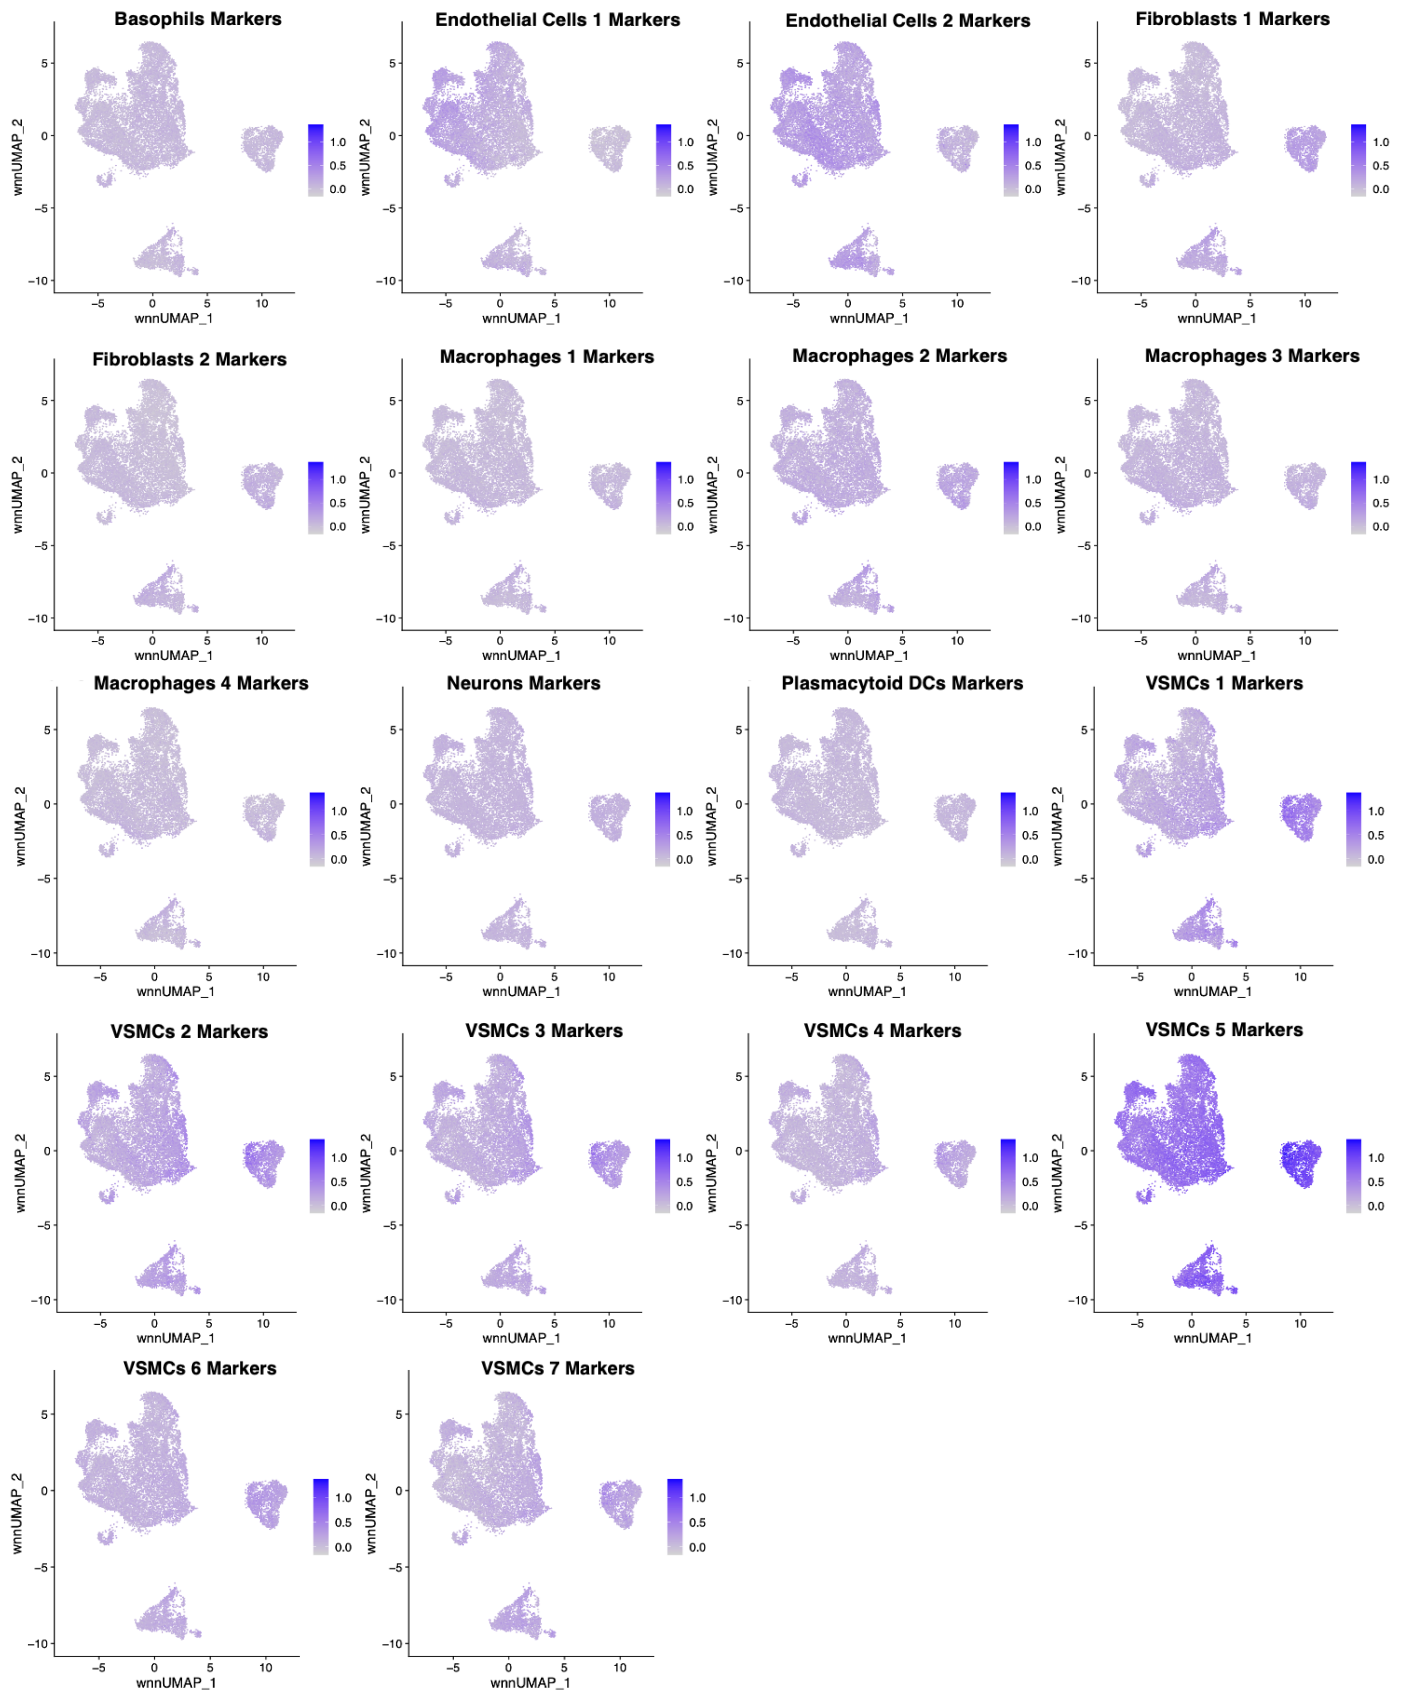



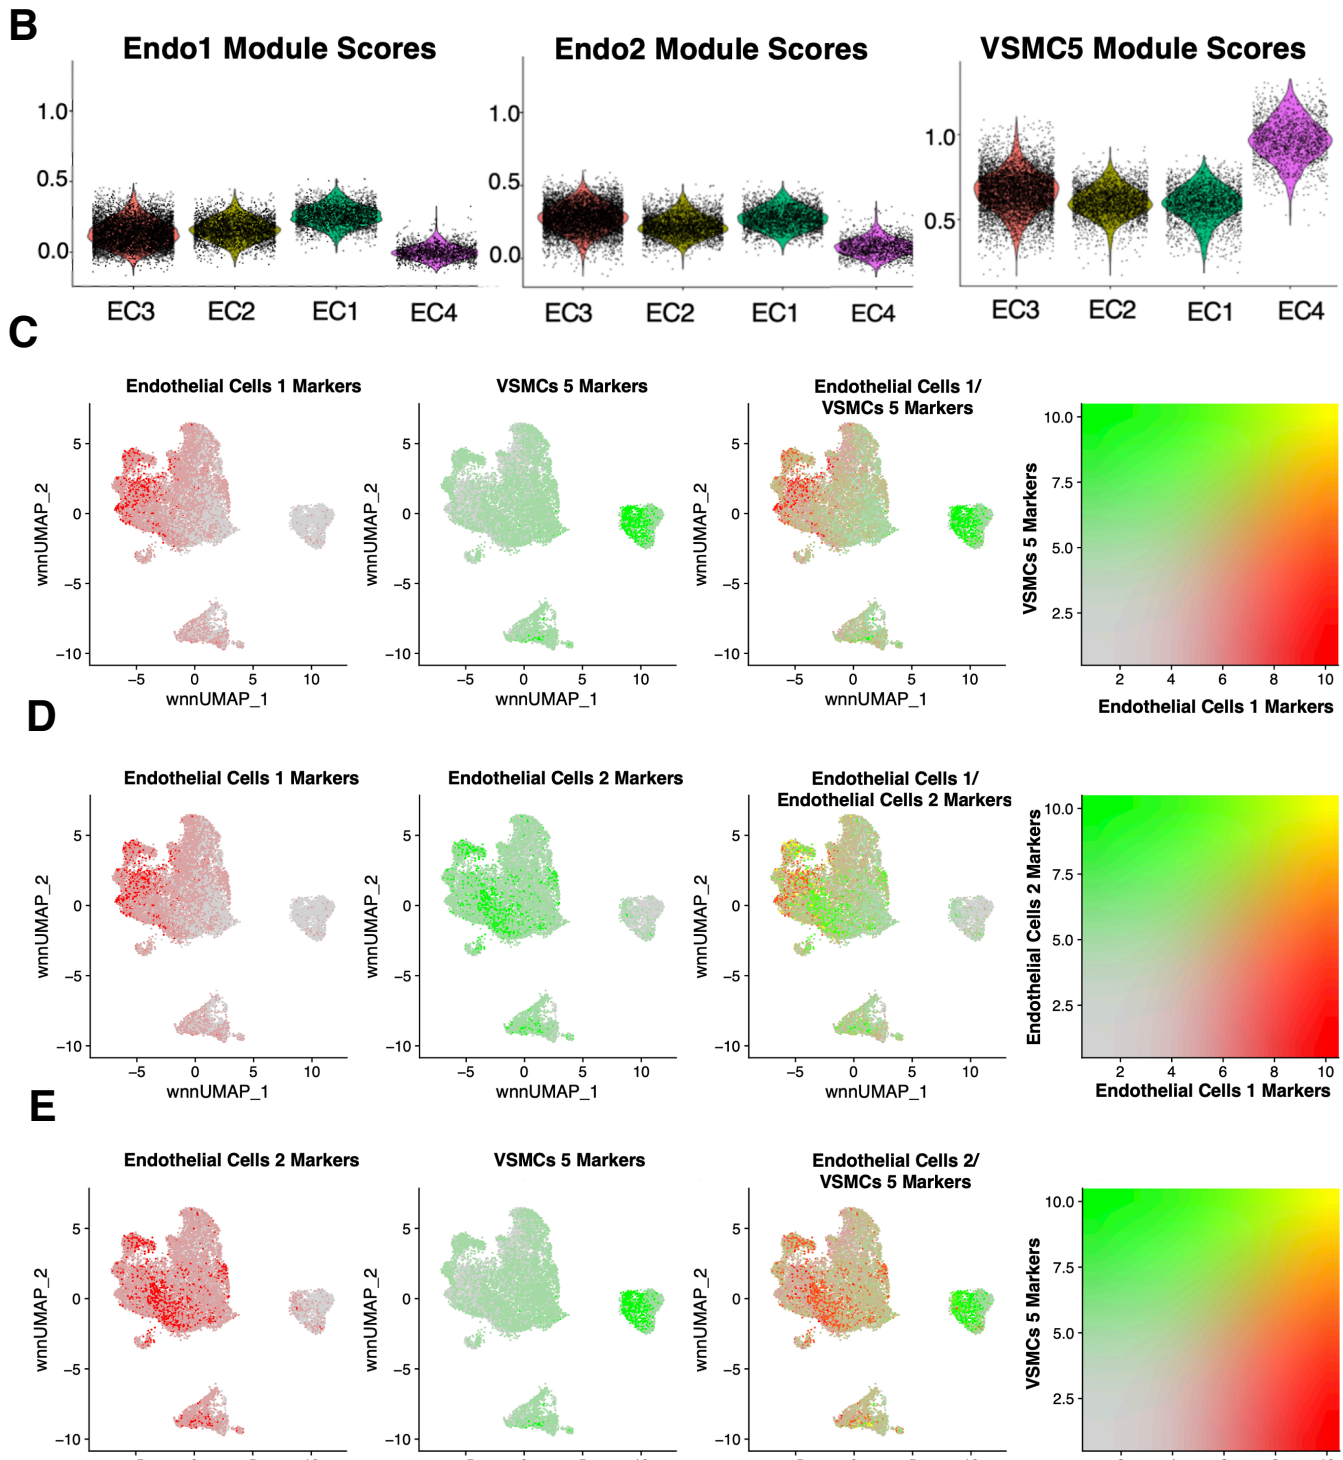

**Supplementary Figure 7 (Figure S7) – Related to Figure 5 | (A)**, Feature plots for each *ex vivo* module score across *in vitro* cells. Briefly, *ex vivo* module scores are generated using top marker genes for each *ex vivo* cell subtype. The Seurat function `AddModuleScore` is used to score each cell for visualization. **(B)**, Violin plots displaying Endothelial Cells 1 (Endo1), Endothelial Cells 2 (Endo2), and VSMCs 5 (VSMC5) module scores for each perturbation across *in vitro* EC1-4. **(C)**, Feature plots displaying distribution of Endo1 (red) versus Endo2 (green) module scores across *in vitro* cells. **(D)**, Feature plots displaying distribution of Endo1 (red) versus VSMC5 (green) module scores across *in vitro* cells. **(E)**, Feature plots displaying distribution of Endo2 (red) versus VSMC5 (green) modules scores across *in vitro* cells.



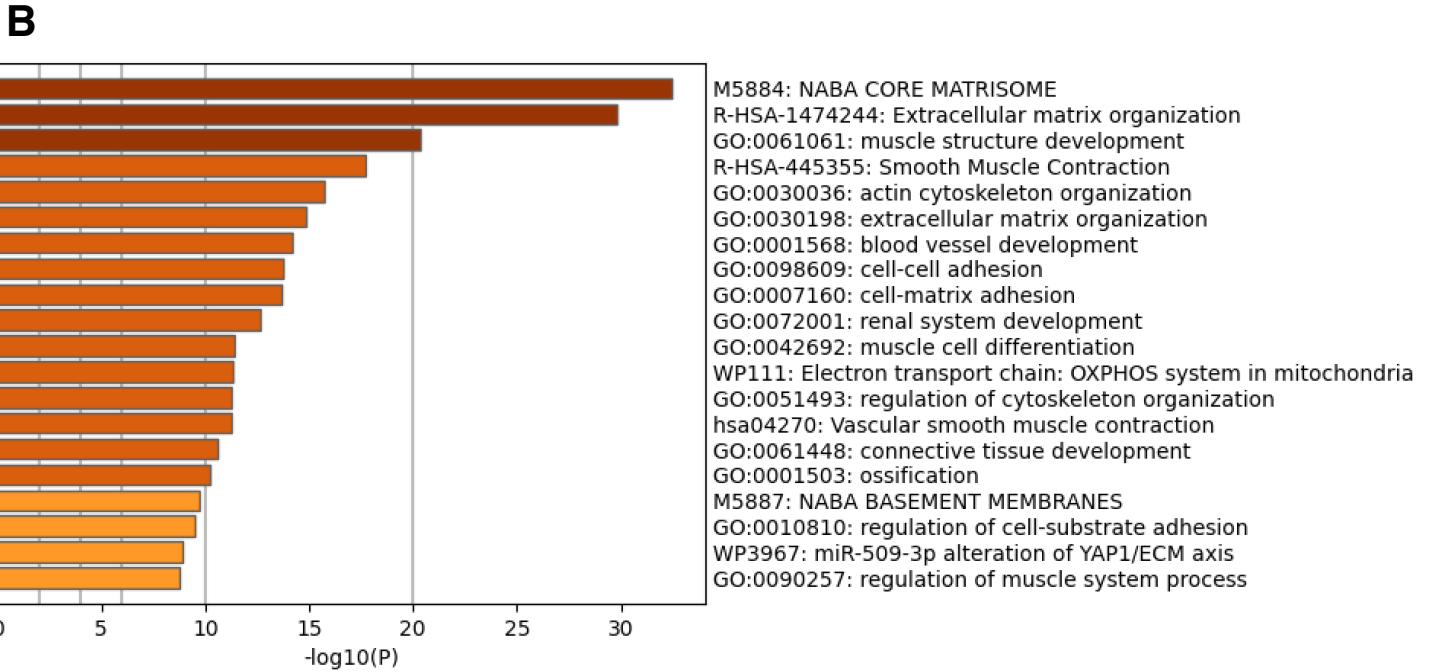

**Supplementary Figure 8 (Figure S8) – Related to Figure 5 I (A)**, Heatmap displaying average expression of VSMC5 maker genes (black arrow) across *in vitro* and *ex vivo* datasets. Rows (genes) and columns (cell subtypes) are clustered based on average expression for each given gene. **(B)**, PEA of the top 200 genes for VSMC5 (adjusted p-value < 0.05).



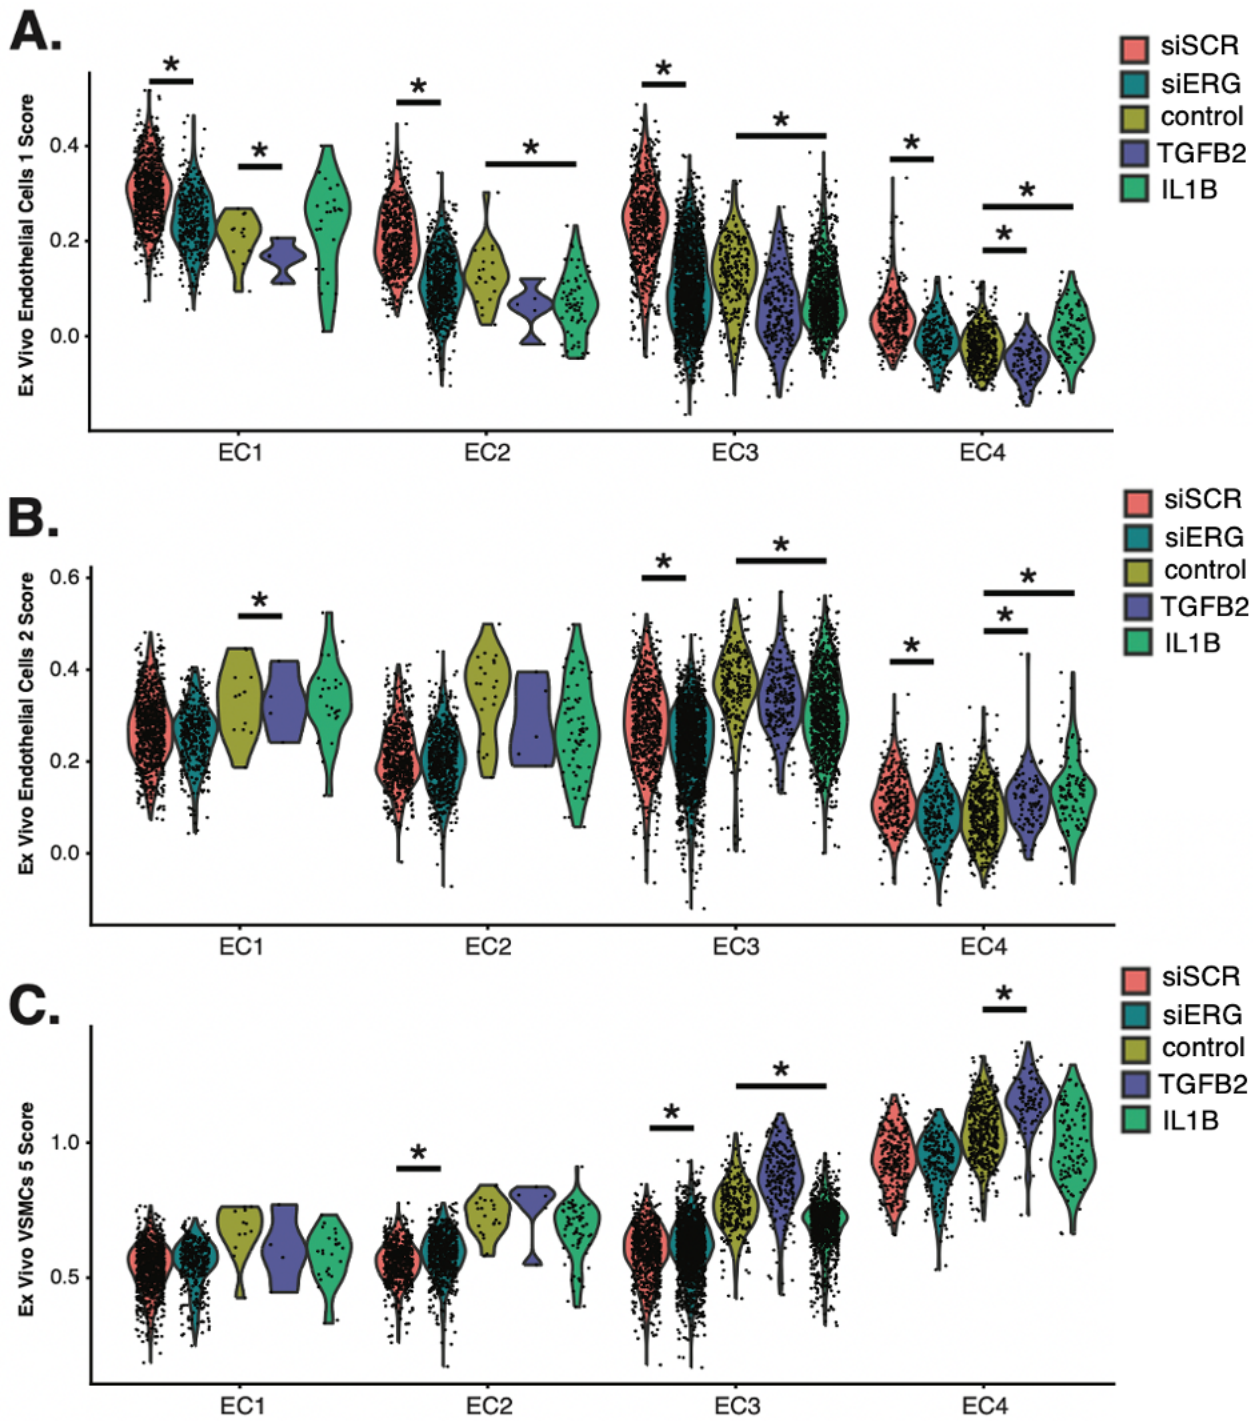

**Supplementary Figure 9 (Figure S9) – Related to Figure 5 | (A),** Violin plots of *ex vivo* Endo1 module scores across EC1-4. **(B),** Violin plots of *ex vivo* Endo2 module scores across EC1-4. **(C),** Violin plots of *ex vivo* VSMC5 module scores across EC1-4. Adjusted p-value for A-C generated using Wilcoxon rank sum test with continuity correction by setting the alternative hypothesis to "two.sided".

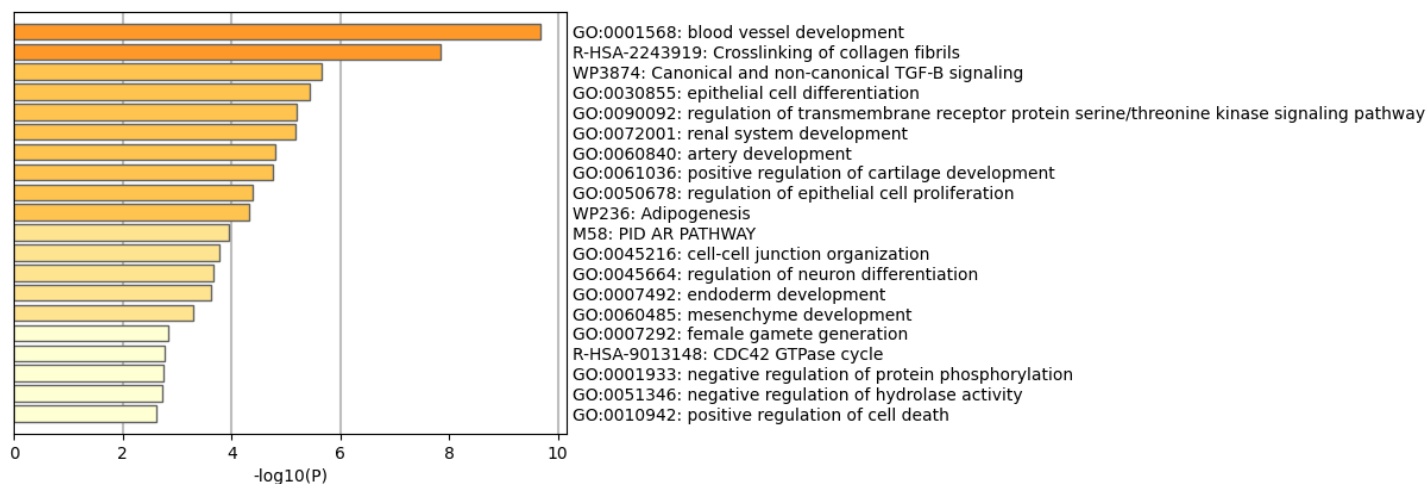

**Supplementary Figure 10 (Figure S10) – Related to Figure 6 |** PEA of significant ( $p$ -value < 0.05) EC4 linked genes which overlap with significant ( $p$ -value <  $10^{-8}$ ) CAD associated SNPs.

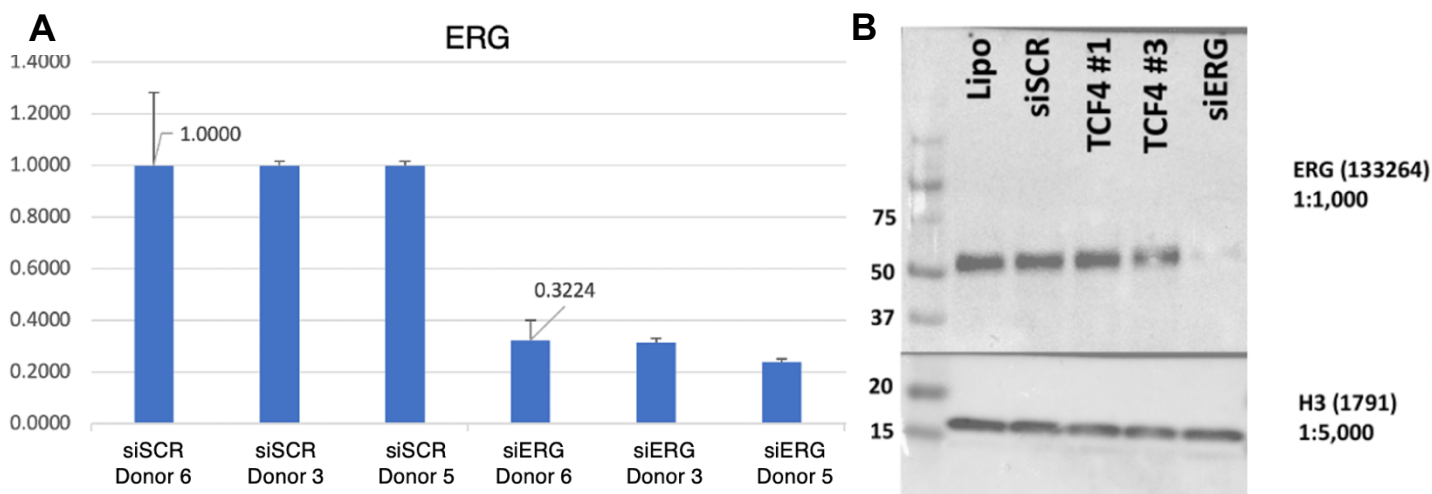

**Supplementary Figure 11 (Figure S11) – Related to Methods I (A),** qPCR results for ERG knockdown across donors. **(B),** Western Blot representing a typical knockdown of siERG with the siRNA pools used in this study. TCF4 samples are irrelevant for the purposes of this study.

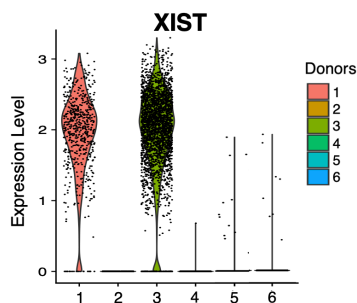

**Supplementary Figure 12 (Figure S12) – Related to Methods I** Violin plot of *XIST* showing expected expression in female *in vitro* donor cells (1 and 3) and lack of expression in male *in vitro* donor cells (2, 4, 5, and 6).
